# Supplementary material
Source: Elsevier journal article supplement (https://www.sciencedirect.com/science/article/pii/S2530064423000263)
Supplement: mmc1 [file S2530064423000263:mmc1.docx]

**Supplementary material**

**SI Table 1.** Mammal, bird and reptile species recorded with the camera traps in each of the three sites (Casanare, Meta and Tillava) in the Llanos region in Colombia.

|  |  |  |  |  |  |
| --- | --- | --- | --- | --- | --- |
| **Species** | **Class** | **Casanare** | **Meta** | **Tillava** | **Total Records** |
|  |  |  |  |  |  |
| Anabacerthia striaticollis | Aves | 0 | 1 | 0 | 1 |
| Anas platyrhynchos domesticus | Aves | 0 | 4 | 0 | 4 |
| Aramides cajaneus | Aves | 279 | 771 | 3 | 1053 |
| Ardea alba | Aves | 0 | 1 | 0 | 1 |
| Arremon axillaris | Aves | 26 | 0 | 0 | 26 |
| Arremon brunneinucha | Aves | 23 | 0 | 0 | 23 |
| Arremon taciturnus | Aves | 2 | 75 | 0 | 77 |
| Arremonops conirostris | Aves | 0 | 9 | 0 | 9 |
| Athene cunicularia | Aves | 0 | 3 | 0 | 3 |
| Atlapetes semirufus | Aves | 1 | 0 | 0 | 1 |
| Basileuterus culicivorus | Aves | 0 | 9 | 0 | 9 |
| Bubulcus ibis | Aves | 4 | 95 | 0 | 99 |
| Burhinus bistriatus | Aves | 0 | 38 | 0 | 38 |
| Buteogallus meridionalis | Aves | 0 | 2 | 1 | 3 |
| Buteogallus schistaceus | Aves | 1 | 0 | 0 | 1 |
| Cacicus cela | Aves | 2 | 0 | 0 | 2 |
| Cantorchilus leucotis | Aves | 2 | 12 | 0 | 14 |
| Caracara cheriway | Aves | 0 | 6 | 11 | 17 |
| Catharus aurantiirostris | Aves | 5 | 0 | 0 | 5 |
| Catharus dryas | Aves | 18 | 0 | 0 | 18 |
| Catharus minimus | Aves | 2 | 0 | 1 | 3 |
| Catharus ustulatus | Aves | 187 | 359 | 0 | 546 |
| Ceratopipra erythrocephala | Aves | 3 | 0 | 0 | 3 |
| Cercomacroides tyrannina | Aves | 0 | 1 | 0 | 1 |
| Chamaepetes goudotii | Aves | 1 | 0 | 0 | 1 |
| Chamaeza campanisona | Aves | 26 | 1 | 0 | 27 |
| Chamaeza turdina | Aves | 8 | 0 | 0 | 8 |
| Chordeiles pusillus | Aves | 0 | 1 | 0 | 1 |
| Cochlearius cochlearius | Aves | 0 | 1 | 0 | 1 |
| Coereba flaveola | Aves | 1 | 0 | 0 | 1 |
| Coragyps atratus | Aves | 0 | 3 | 0 | 3 |
| Crotophaga ani | Aves | 1 | 10 | 0 | 11 |
| Crotophaga major | Aves | 14 | 21 | 0 | 35 |
| Crypturellus cinereus | Aves | 61 | 343 | 41 | 445 |
| Crypturellus soui | Aves | 127 | 60 | 1 | 188 |
| Cyanocorax violaceus | Aves | 25 | 45 | 0 | 70 |
| Cyanocorax yncas | Aves | 3 | 0 | 0 | 3 |
| Dendrocincla fuliginosa | Aves | 1 | 19 | 0 | 20 |
| Dendroplex picus | Aves | 0 | 0 | 1 | 1 |
| Diglossa cyanea | Aves | 1 | 0 | 0 | 1 |
| Dromococcyx pavoninus | Aves | 1 | 0 | 0 | 1 |
| Dryocopus lineatus | Aves | 0 | 0 | 1 | 1 |
| Dysithamnus mentalis | Aves | 0 | 1 | 0 | 1 |
| Egretta caerulea | Aves | 0 | 1 | 0 | 1 |
| Eudocimus ruber | Aves | 0 | 1 | 0 | 1 |
| Eurypyga helias | Aves | 7 | 1 | 0 | 8 |
| Florisuga mellivora | Aves | 0 | 1 | 0 | 1 |
| Gallus gallus | Aves | 0 | 460 | 0 | 460 |
| Gallus gallus domesticus | Aves | 71 | 0 | 0 | 71 |
| Geothlypis philadelphia | Aves | 0 | 1 | 0 | 1 |
| Geotrygon montana | Aves | 0 | 35 | 3 | 38 |
| Gymnomystax mexicanus | Aves | 0 | 12 | 0 | 12 |
| Leptotila rufaxilla | Aves | 1234 | 229 | 3 | 1466 |
| Leptotila verreauxi | Aves | 601 | 68 | 2 | 671 |
| Malacoptila mystacalis | Aves | 2 | 0 | 0 | 2 |
| Manacus manacus | Aves | 0 | 2 | 0 | 2 |
| Megascops choliba | Aves | 0 | 3 | 0 | 3 |
| Meleagris gallopavo | Aves | 0 | 1 | 0 | 1 |
| Mesembrinibis cayennensis | Aves | 3 | 98 | 0 | 101 |
| Micrastur semitorquatus | Aves | 1 | 0 | 0 | 1 |
| Microcerculus marginatus | Aves | 0 | 1 | 0 | 1 |
| Milvago chimachima | Aves | 0 | 4 | 0 | 4 |
| Mitu tomentosum | Aves | 11 | 3 | 0 | 14 |
| Momotus momota | Aves | 132 | 37 | 8 | 177 |
| Myioborus miniatus | Aves | 1 | 0 | 0 | 1 |
| Myiothlypis fulvicauda | Aves | 0 | 1 | 0 | 1 |
| Myrmeciza longipes | Aves | 5 | 0 | 0 | 5 |
| Myrmoborus leucophrys | Aves | 7 | 8 | 0 | 15 |
| Myrmoborus myotherinus | Aves | 0 | 20 | 0 | 20 |
| Myrmophylax atrothorax | Aves | 0 | 7 | 0 | 7 |
| Numida meleagris | Aves | 0 | 20 | 0 | 20 |
| Nycticorax nycticorax | Aves | 2 | 0 | 0 | 2 |
| Nyctidromus albicollis | Aves | 212 | 106 | 1 | 319 |
| Odontophorus gujanensis | Aves | 1 | 15 | 0 | 16 |
| Odontophorus strophium | Aves | 1 | 0 | 0 | 1 |
| Ortalis guttata | Aves | 0 | 34 | 0 | 34 |
| Ortalis ruficauda | Aves | 97 | 0 | 0 | 97 |
| Pachyramphus rufus | Aves | 1 | 0 | 0 | 1 |
| Patagioenas speciosa | Aves | 1 | 0 | 0 | 1 |
| Penelope argyrotis | Aves | 1 | 1 | 0 | 2 |
| Penelope jacquacu | Aves | 2 | 45 | 0 | 47 |
| Phaethornis atrimentalis | Aves | 0 | 3 | 0 | 3 |
| Phaethornis griseogularis | Aves | 0 | 3 | 1 | 4 |
| Pheugopedius rutilus | Aves | 1 | 2 | 0 | 3 |
| Phimosus infuscatus | Aves | 2 | 14 | 0 | 16 |
| Piaya cayana | Aves | 3 | 3 | 0 | 6 |
| Piranga rubra | Aves | 1 | 0 | 0 | 1 |
| Pitangus sulphuratus | Aves | 0 | 3 | 0 | 3 |
| Psarocolius angustifrons | Aves | 0 | 2 | 0 | 2 |
| Psarocolius decumanus | Aves | 16 | 10 | 0 | 26 |
| Pteroglossus castanotis | Aves | 1 | 0 | 0 | 1 |
| Quiscalus lugubris | Aves | 3 | 0 | 0 | 3 |
| Ramphocelus carbo | Aves | 0 | 4 | 2 | 6 |
| Rupornis magnirostris | Aves | 8 | 31 | 3 | 42 |
| Saltator maximus | Aves | 0 | 11 | 1 | 12 |
| Setophaga ruticilla | Aves | 0 | 2 | 0 | 2 |
| Spinus psaltria | Aves | 1 | 0 | 0 | 1 |
| Sporophila intermedia | Aves | 0 | 2 | 0 | 2 |
| Sturnella magna | Aves | 0 | 1 | 0 | 1 |
| Synallaxis albescens | Aves | 0 | 1 | 0 | 1 |
| Syrigma sibilatrix | Aves | 0 | 17 | 0 | 17 |
| Tachyphonus rufus | Aves | 0 | 1 | 0 | 1 |
| Tangara episcopus | Aves | 0 | 1 | 0 | 1 |
| Tangara palmarum | Aves | 1 | 0 | 0 | 1 |
| Taraba major | Aves | 2 | 0 | 0 | 2 |
| Tersina viridis | Aves | 0 | 1 | 0 | 1 |
| Thryophilus rufalbus | Aves | 4 | 0 | 0 | 4 |
| Tigrisoma lineatum | Aves | 0 | 2 | 0 | 2 |
| Tinamus guttatus | Aves | 1 | 0 | 2 | 3 |
| Tinamus major | Aves | 0 | 0 | 1 | 1 |
| Tinamus tao | Aves | 14 | 0 | 0 | 14 |
| Troglodytes aedon | Aves | 0 | 2 | 0 | 2 |
| Turdus albicollis | Aves | 2 | 0 | 1 | 3 |
| Turdus debilis | Aves | 1 | 0 | 0 | 1 |
| Turdus ignobilis | Aves | 1 | 2 | 0 | 3 |
| Turdus leucomelas | Aves | 95 | 38 | 0 | 133 |
| Turdus nudigenis | Aves | 14 | 19 | 0 | 33 |
| Vanellus chilensis | Aves | 0 | 17 | 0 | 17 |
| Veniliornis passerinus | Aves | 0 | 1 | 0 | 1 |
| Zentrygon linearis | Aves | 170 | 37 | 0 | 207 |
| Bos taurus | Mammalia | 207 | 1574 | 27 | 1808 |
| Cabassous unicinctus | Mammalia | 0 | 9 | 0 | 9 |
| Caluromys lanatus | Mammalia | 3 | 3 | 0 | 6 |
| Canis familiaris | Mammalia | 192 | 181 | 1 | 374 |
| Cerdocyon thous | Mammalia | 81 | 213 | 11 | 305 |
| Choloepus didactylus | Mammalia | 0 | 3 | 0 | 3 |
| Coendou prehensilis | Mammalia | 12 | 6 | 0 | 18 |
| Cuniculus paca | Mammalia | 388 | 175 | 60 | 623 |
| Dasyprocta fuliginosa | Mammalia | 235 | 28 | 108 | 371 |
| Dasypus kappleri | Mammalia | 0 | 9 | 0 | 9 |
| Dasypus novemcinctus | Mammalia | 425 | 289 | 2 | 716 |
| Didelphis marsupialis | Mammalia | 482 | 523 | 25 | 1030 |
| Eira barbara | Mammalia | 127 | 66 | 4 | 197 |
| Equus caballus | Mammalia | 21 | 223 | 1 | 245 |
| Equus mulus | Mammalia | 0 | 11 | 0 | 11 |
| Felis catus | Mammalia | 96 | 68 | 0 | 164 |
| Galictis vittata | Mammalia | 6 | 1 | 0 | 7 |
| Herpailurus yagouaroundi | Mammalia | 10 | 2 | 0 | 12 |
| Homo sapiens | Mammalia | 259 | 399 | 57 | 715 |
| Hydrochoerus hydrochaeris | Mammalia | 0 | 0 | 1 | 1 |
| Leopardus pardalis | Mammalia | 47 | 30 | 7 | 84 |
| Leopardus wiedii | Mammalia | 7 | 3 | 0 | 10 |
| Lontra longicaudis | Mammalia | 1 | 0 | 0 | 1 |
| Marmosa robinsoni | Mammalia | 61 | 0 | 4 | 65 |
| Mazama americana | Mammalia | 117 | 0 | 0 | 117 |
| Metachirus nudicaudatus | Mammalia | 90 | 0 | 0 | 90 |
| Myrmecophaga tridactyla | Mammalia | 82 | 201 | 2 | 285 |
| Nasua nasua | Mammalia | 20 | 17 | 0 | 37 |
| Odocoileus hemionus | Mammalia | 0 | 0 | 1 | 1 |
| Odocoileus virginianus | Mammalia | 41 | 6 | 29 | 76 |
| Pecari tajacu | Mammalia | 64 | 0 | 17 | 81 |
| Philander opossum | Mammalia | 0 | 481 | 0 | 481 |
| Plecturocebus ornatus | Mammalia | 0 | 3 | 0 | 3 |
| Priodontes maximus | Mammalia | 0 | 1 | 4 | 5 |
| Procyon cancrivorus | Mammalia | 7 | 14 | 0 | 21 |
| Proechimys canicollis | Mammalia | 1 | 0 | 0 | 1 |
| Proechimys oconnelli | Mammalia | 6 | 0 | 0 | 6 |
| Puma concolor | Mammalia | 5 | 3 | 3 | 11 |
| Saimiri sciureus | Mammalia | 0 | 84 | 0 | 84 |
| Sapajus apella | Mammalia | 15 | 38 | 3 | 56 |
| Sciurus granatensis | Mammalia | 63 | 90 | 2 | 155 |
| Sciurus igniventris | Mammalia | 0 | 6 | 0 | 6 |
| Tamandua tetradactyla | Mammalia | 179 | 156 | 29 | 364 |
| Tapirus terrestris | Mammalia | 0 | 0 | 7 | 7 |
| Urocyon cinereoargenteus | Mammalia | 1 | 0 | 0 | 1 |
| Ameiva ameiva | Reptilia | 4 | 2 | 0 | 6 |
| Iguana iguana | Reptilia | 2 | 15 | 0 | 17 |

**SI Table 2.** Diel activity patterns, diet, body size and hunting pressure of the 15 understory mammals and 11understory bird species assessed. The mean activity time is a circular statistics version of the arithmetic mean, while the Rho is a circular statistics descriptor of dispersion. Activity is abbreviated as “D” for diurnal species, “N” for nocturnal and “C” for Cathemeral. The Ocelots are hunted not for their meat but for their fur or as retaliation due to killing of domestic animals “*”. Tinamous, the giant ant eater and the common opossum can be opportunistically hunted but are not heavily persecuted “**”.

| **Class** | **Species** | **Common name** | **Diet** | **Body size in kg (Animal Diversity Web 2022)** | **Body size in kg (Emmons 1997)** | **Body size in kg (Ocampo et al. 2021)** | **Game Species** | **Activity** | **Nocturnal records (%)** | **Mean Activity Time** | **Rho** | **N. Records** | **N. Sites** |
| --- | --- | --- | --- | --- | --- | --- | --- | --- | --- | --- | --- | --- | --- |
| **Mammals** | *Cerdocyon thous* | Crab-eating fox | Omnivore | 5 - 8 | 3.6 - 7.9 | 3.45 | No | N | 88.1 | 23:43 | 0.46 | 294 | 56 |
| ***Cuniculus paca*** | **Paca** | Herbivore | 7 - 12 | 5 - 13 | 6.119 | Yes | N | 93.56 | 23:16 | 0.65 | 621 | 107 |
| ***Dasyprocta fuliginosa*** | **Agouti** | Herbivore | 1.3 - 4 | 3.5 - 6 | 3.048 | Yes | D | 13.48 | 12:50 | 0.46 | 371 | 71 |
| *Dasypus novemcinctus* | Nine-banded armadillo | Omnivore | 3.6 - 7.7 | 2.7 - 6.3 | 4.73 | Yes | N | 95.94 | 23:15 | 0.69 | 715 | 137 |
| ***Didelphis marsupialis*** | **Common opossum** | Omnivore | 1.5 | 0.6 - 1.6 | 0.232 | Yes** | D | 96.8 | 23:45 | 0.62 | 1030 | 171 |
| *Eira barbara* | Tayra | Omnivore | 3 - 6 | 2.7 - 7 |  | No | D | 11.4 | 11:37 | 0.53 | 193 | 73 |
| *Leopardus pardalis* | Ocelot | Carnivore | 8.5 - 16 | 8 - 9 | 13.5 | Yes* | N | 79.52 | 00:04 | 0.4 | 83 | 60 |
| *Mazama americana* | Red brocket | Herbivore | 20 - 55 | 24 - 48 |  | Yes | C | 40.17 | 11:49 | 0.09 | 117 | 41 |
| *Myrmecophaga tridactyla* | Giant anteater | Insectivore | 18 - 39 | 22 - 39 |  | Yes** | C | 70.57 | 23:36 | 0.36 | 283 | 102 |
| *Nasua nasua* | Ring tailed coati | Omnivore | 3 - 6 | 3 - 7.2 | 2.825 | No | D | 17.24 | 13:37 | 0.41 | 29 | 19 |
| *Odocoileus virginianus* | White-tailed deer | Herbivore | 57 - 137 | 30 - 50 |  | Yes | C | 31.58 | 10:27 | 0.23 | 76 | 35 |
| *Pecari tajacu* | Collared peccary | Omnivore | 15 - 25 | 17 - 35 |  | Yes | D | 15.38 | 11:09 | 0.53 | 78 | 33 |
| ***Philander opossum*** | **Gray four-eyed opossum** | Omnivore | 0.2 - 0.7 | 0.2 - 0.6 | 0.405 | No | N | 94.36 | 23:12 | 0.58 | 479 | 58 |
| ***Tamandua tetradactyla*** | **Collared anteater** | Insectivore | 4.5 | 3.6 - 8.4 |  | No | N | 87.02 | 00:28 | 0.56 | 362 | 164 |
| ***Birds*** | *Aramides cajaneus* | Grey-necked wood rail | Omnivore |  |  | 0.42 | No | D | 11.3 | 11:40 | 0.5 | 1044 | 114 |
| *Arremon taciturnus* | Pectoral sparrow | Omnivore |  |  | 0.03 | No | D | 12.99 | 11:41 | 0.46 | 77 | 23 |
| ***Catharus ustulatus*** | **Swainson's thrush** | Omnivore |  |  | 0.03 | No | D | 5.13 | 11:21 | 0.61 | 546 | 51 |
| *Crypturellus cinereus* | Cinereous tinamou | Omnivore |  |  | 0.49 | Yes** | D | 5.37 | 11:06 | 0.55 | 428 | 109 |
| ***Crypturellus soui*** | **Little tinamou** | Omnivore |  |  | 0.20 | Yes** | D | 5.32 | 11:17 | 0.52 | 188 | 48 |
| *Leptotila rufaxilla* | Grey-fronted dove | Herbivore |  |  | 0.14 | No | D | 2.34 | 11:25 | 0.65 | 1451 | 124 |
| ***Leptotila verreauxi*** | **White-tipped dove** | Herbivore |  |  | 0.13 | No | D | 2.01 | 11:05 | 0.68 | 647 | 87 |
| ***Momotus momota*** | **Amazonian motmot** | Omnivore |  |  | 0.11 | No | D | 2.84 | 11:30 | 0.61 | 176 | 56 |
| *Myrmoborus myotherinus* | Black-faced antbird | Insectivore |  |  | 0.02 | No | D | 50 | 13:38 | 0.17 | 20 | 6 |
| ***Nyctidromus albicollis*** | **Pauraque** | Insectivore |  |  | 0.05 | No | C | 75.79 | 19:49 | 0.23 | 318 | 48 |
| *Vanellus chilensis* | Southern lapwing | Omnivore |  |  | 0.26 | No | D | 29.41 | 13:26 | 0.32 | 17 | 4 |
